# Supplementary material
Source: PubMed Central journal article supplement (PMC6182894)
Supplement: zam020188794s1.pdf [file zam020188794s1.pdf]

**Supplemental Information** – Manetsberger J, Ghosh A, Hall EA and Christie G.

Table S1 Orthologues of proteins encoded in the *B. megaterium* QM B1551 genome that are either present or involved in the formation of the *B. subtilis* crust or *B. cereus* family exosporium

| <i>B. subtilis</i> <sup>a</sup> | <i>B. cereus</i> family <sup>b</sup> | <i>B. megaterium</i> <sup>c</sup> |
|---------------------------------|--------------------------------------|-----------------------------------|
| CgeA                            | -                                    | -                                 |
| CotG                            | -                                    | -                                 |
| CotV                            | + <sup>d</sup>                       | -                                 |
| CotW                            | + <sup>d</sup>                       | BMQ_pBM60030                      |
| CotX                            | + <sup>d</sup>                       | BMQ_pBM60028<br>BMQ_pBM60029      |
| CotY                            | CotY                                 | -                                 |
| CotZ                            | ExsY                                 | -                                 |
| -                               | <i>Alr</i> (alanine racemase)        | BMQ_0226                          |
| -                               | BclA/BclB                            | BMQ_pBM50077<br>BMQ_pBM50081      |
| -                               | BetA                                 | -                                 |
| -                               | ExsFA (BxpB)/ExsFB                   | BMQ_pBM60048                      |
| -                               | ExsA <sup>e</sup>                    | BMQ_4649 (SafA)                   |
| -                               | ExsB                                 | -                                 |
| -                               | ExsC                                 | -                                 |
| -                               | ExsFB                                | -                                 |
| -                               | ExsH                                 | -                                 |
| -                               | ExsK                                 | -                                 |
| -                               | ExsM                                 | -                                 |

<sup>a</sup> Crust proteins defined by (1, 2).

<sup>b</sup> Exosporium proteins defined by (3).

<sup>c</sup> Orthologues identified by BLAST searches against the *B. megaterium* QM B1551 genome using *B. subtilis* and/or *B. cereus* family proteins as query sequences.

<sup>d</sup> Absent in *B. anthracis* (4).

<sup>e</sup> ExsA is orthologous to *B. subtilis* SafA, which is not a component of the spore crust.

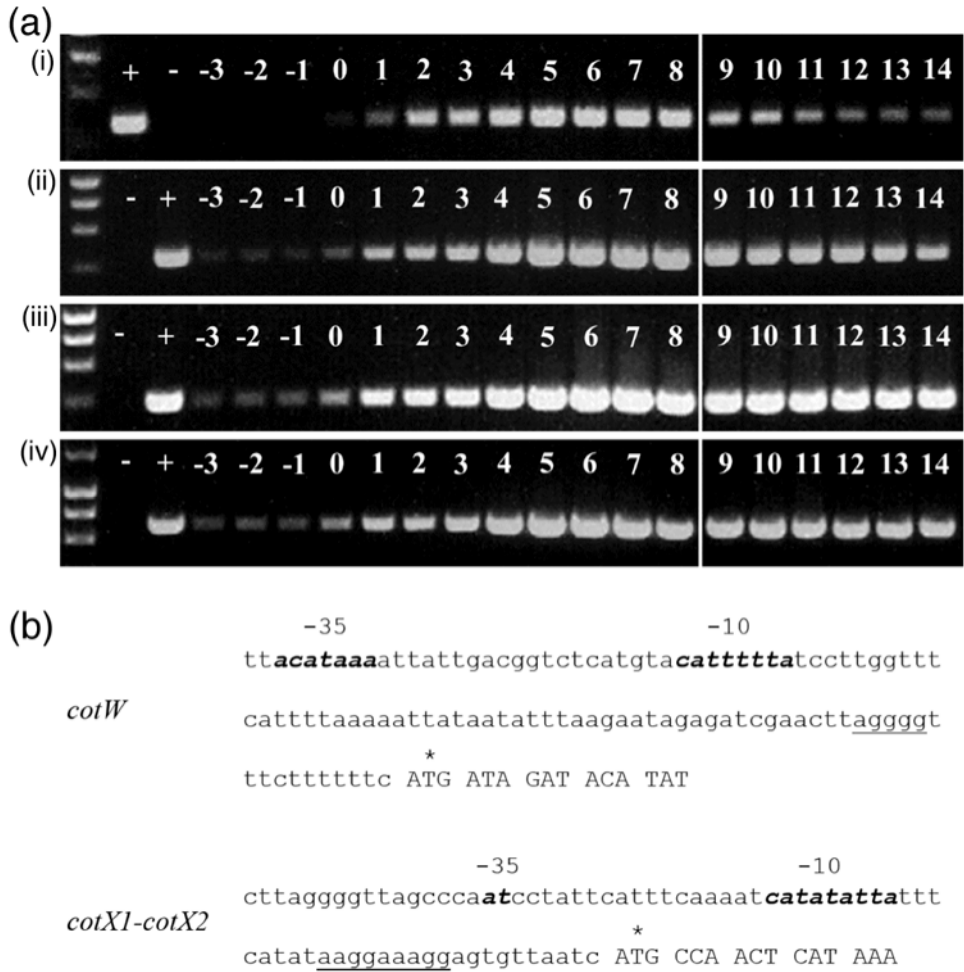

Figure S1 (a) Transcription of (i) *cotW*, (ii) *cotX1* and (iii) *cotX2* during sporulation of *B. megaterium* QM B1551. RT-PCR derived products obtained using primers that span the putative *cotX1-cotX2* operon are shown in (iv). RT-PCR was conducted on samples collected at hourly intervals preceding and during sporulation. Key: – and +, RT-PCR controls; numbers denote time (h) preceding and post entry to stationary phase (0).

(b) Putative upstream promoter sequences for *cotW* and *cotX1-cotX2*. Predicted -35 and -10 regions are italicised and in bold, and potential Shine-Dalgarno sequences underlined. Predicted start codons are marked with an asterisk.

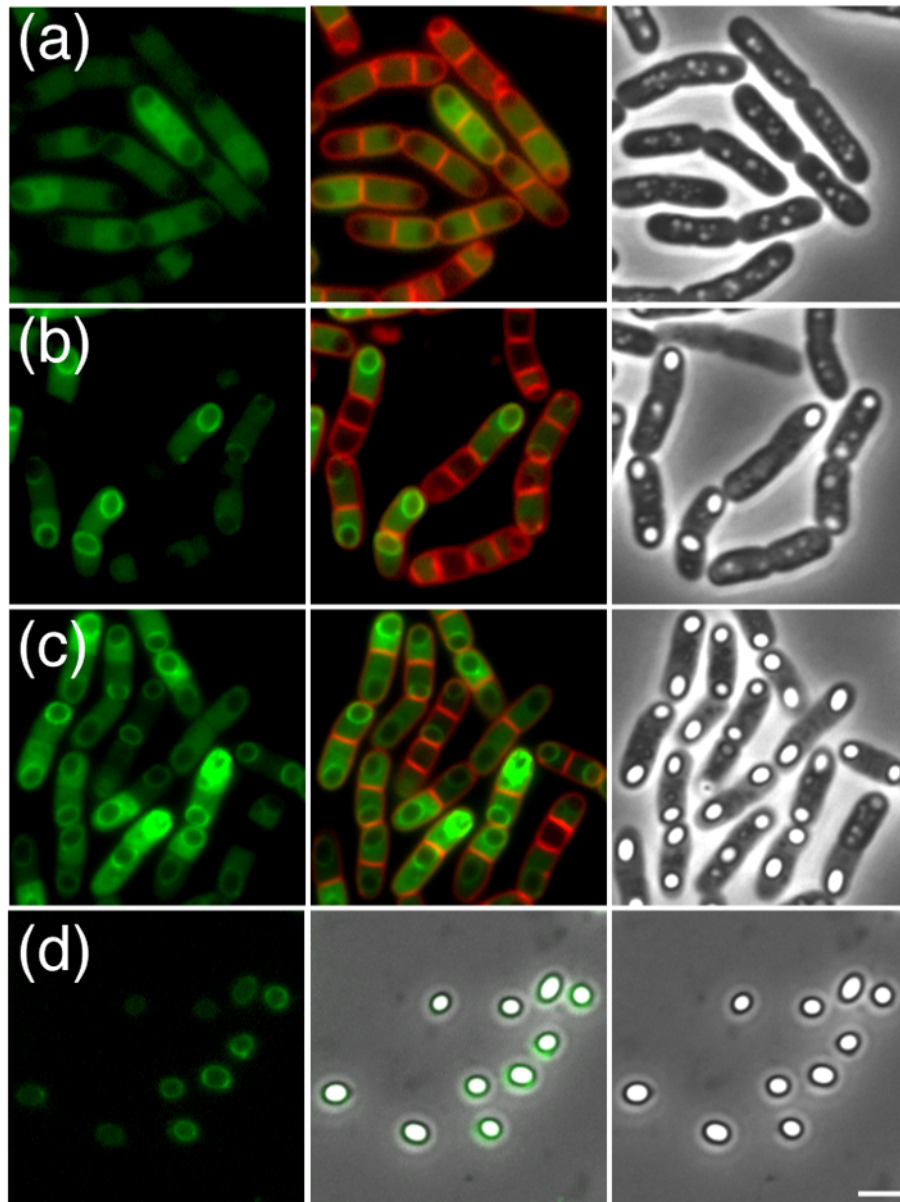

Figure S2 Fluorescence and phase contrast micrographs of sporulating *B. megaterium* QM B1551 *cotW-gfp* cells. The columns show (from left to right) GFP-associated fluorescence, FM4-64 stains overlaid with GFP, and phase contrast images respectively. Rows (a), (b), (c) and (d) denote images taken 3, 5, 8 and 24 hours after entry to sporulation. The scale bar represents 2.5  $\mu\text{m}$ .

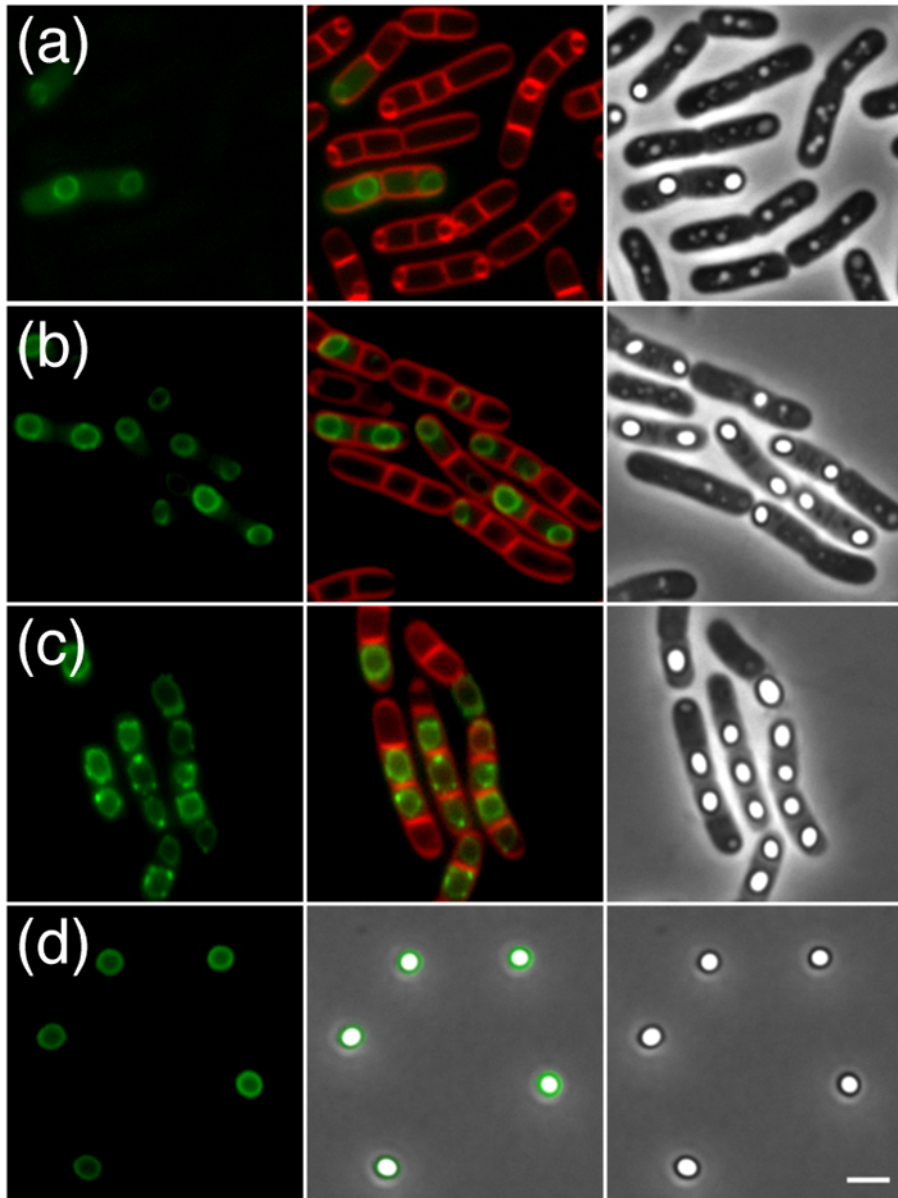

Figure S3 Fluorescence and phase contrast micrographs of sporulating *B. megaterium* QM B1551 *gfp-cotX1* cells. The columns show (from left to right) GFP-associated fluorescence, FM4-64 stains overlaid with GFP, and phase contrast images respectively. Rows (a), (b), (c) and (d) denote images taken 3, 5, 8 and 24 hours after entry to sporulation. The scale bar represents 2.5  $\mu\text{m}$ .

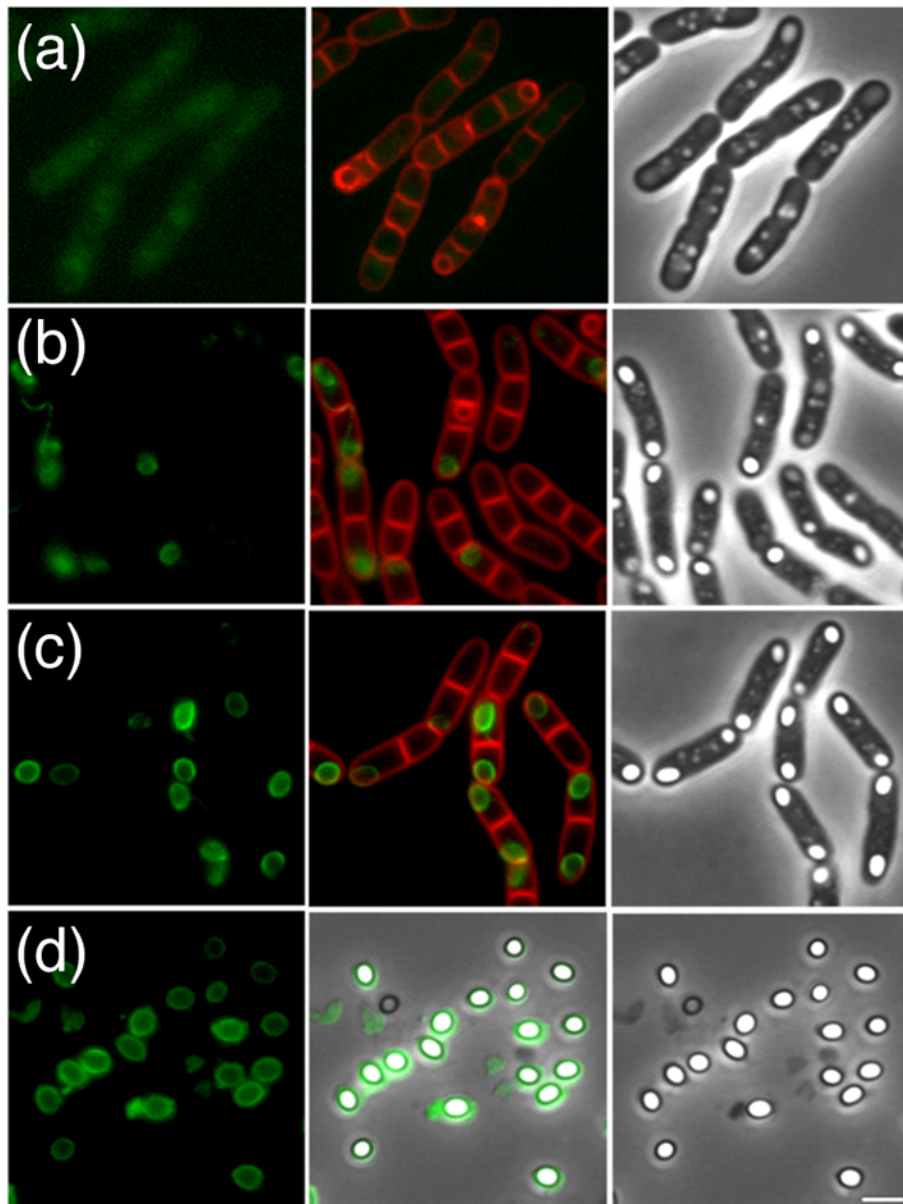

Figure S4 Fluorescence and phase contrast micrographs of sporulating *B. megaterium* QM B1551 *cotX2-gfp* cells. The columns show (from left to right) GFP-associated fluorescence, FM4-64 stains overlaid with GFP, and phase contrast images respectively. Rows (a), (b), (c) and (d) denote images taken 3, 5, 8 and 24 hours after entry to sporulation. The scale bar represents 2.5  $\mu\text{m}$ .

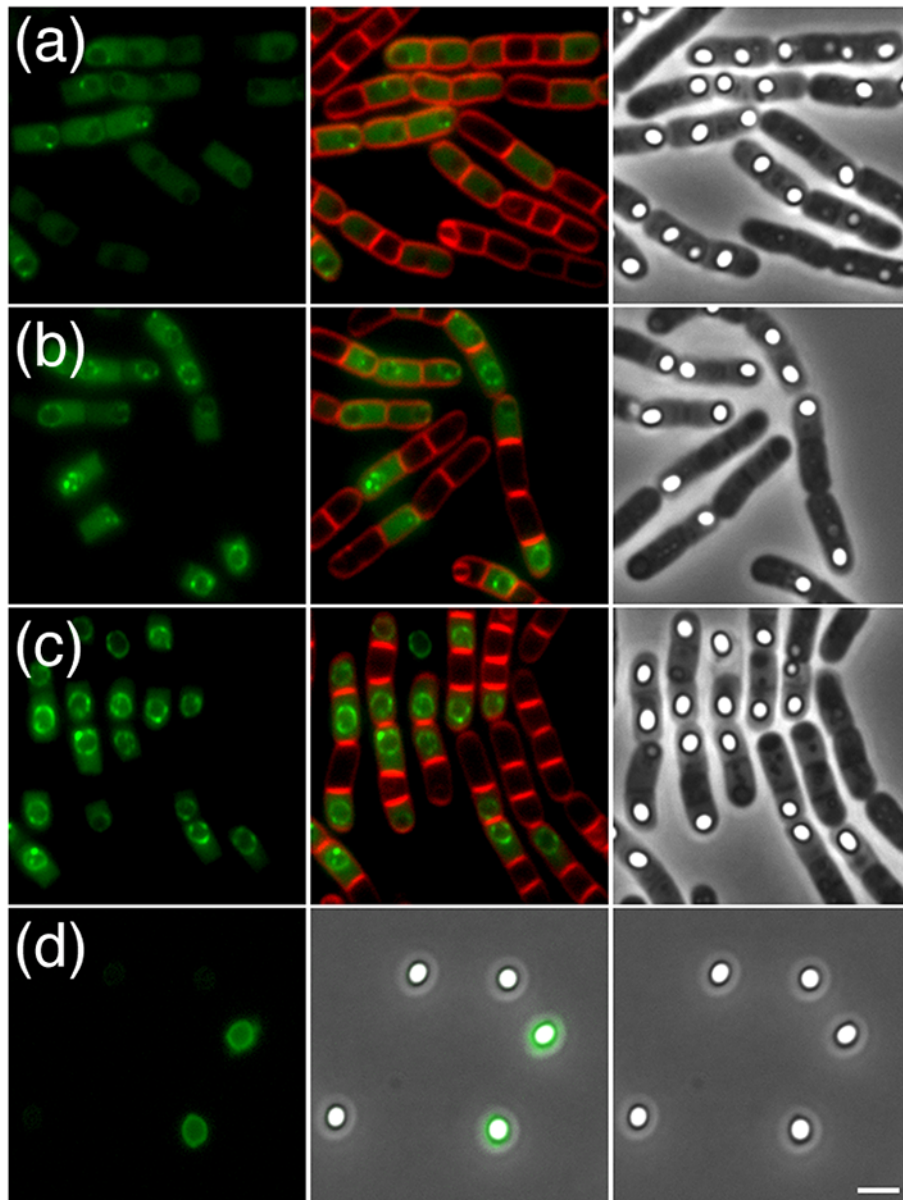

Figure S5 Fluorescence and phase contrast micrographs of sporulating *B. megaterium* PV361 *gfp-cotX1* cells. The columns show (from left to right) GFP-associated fluorescence, FM4-64 stains overlaid with GFP, and phase contrast images respectively. Rows (a), (b), (c) and (d) denote images taken 4, 6, 8 and 24 hours after entry to sporulation. The scale bar represents 2.5  $\mu\text{m}$ .

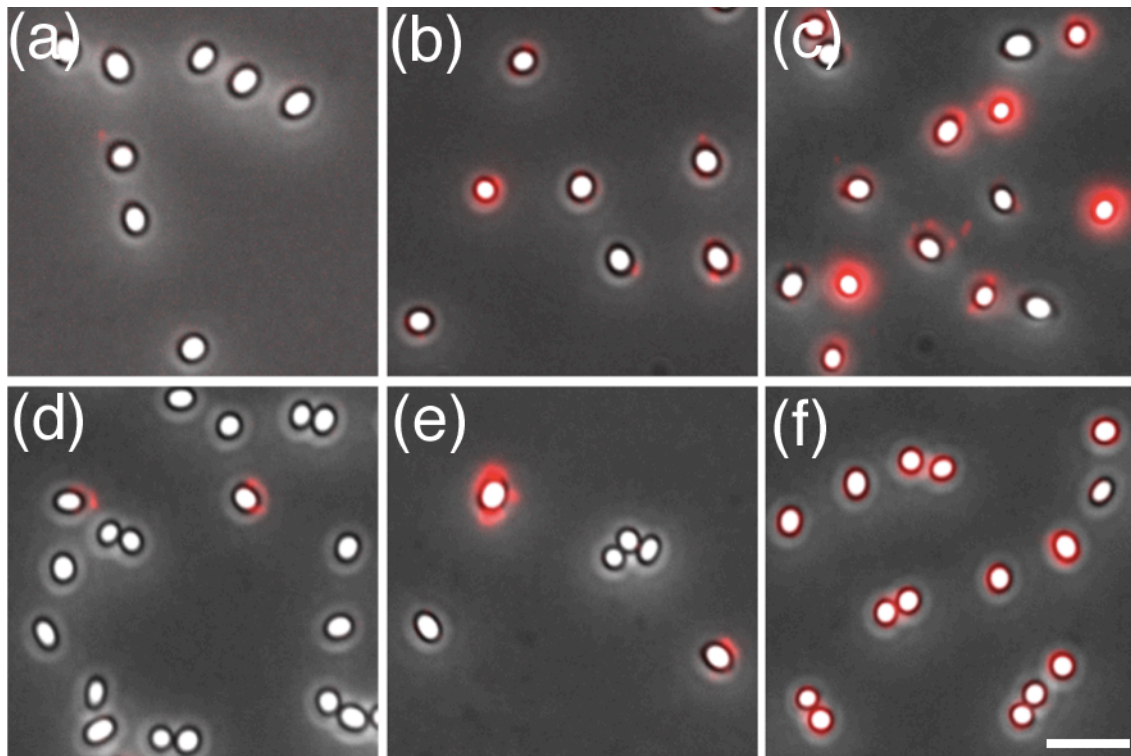

Figure S6 Immunodetection of CotW-GFP and CotX-GFP fusion proteins in spores of *B. megaterium* QM B1551 carrying plasmid-borne copies of (a) *cotW-gfp*, (b) *gfp-cotX1* and (c) *cotW-cotX1-cotX2-gfp*. Phase contrast images overlaid with fluorescence micrographs are also shown for spores of the PV361 strain complemented with plasmid-borne (d) *cotW-gfp*, (e) *gfp-cotX1*, and (f) *cotW-cotX1-cotX2-gfp*. The scale bar denotes 5  $\mu\text{m}$ .

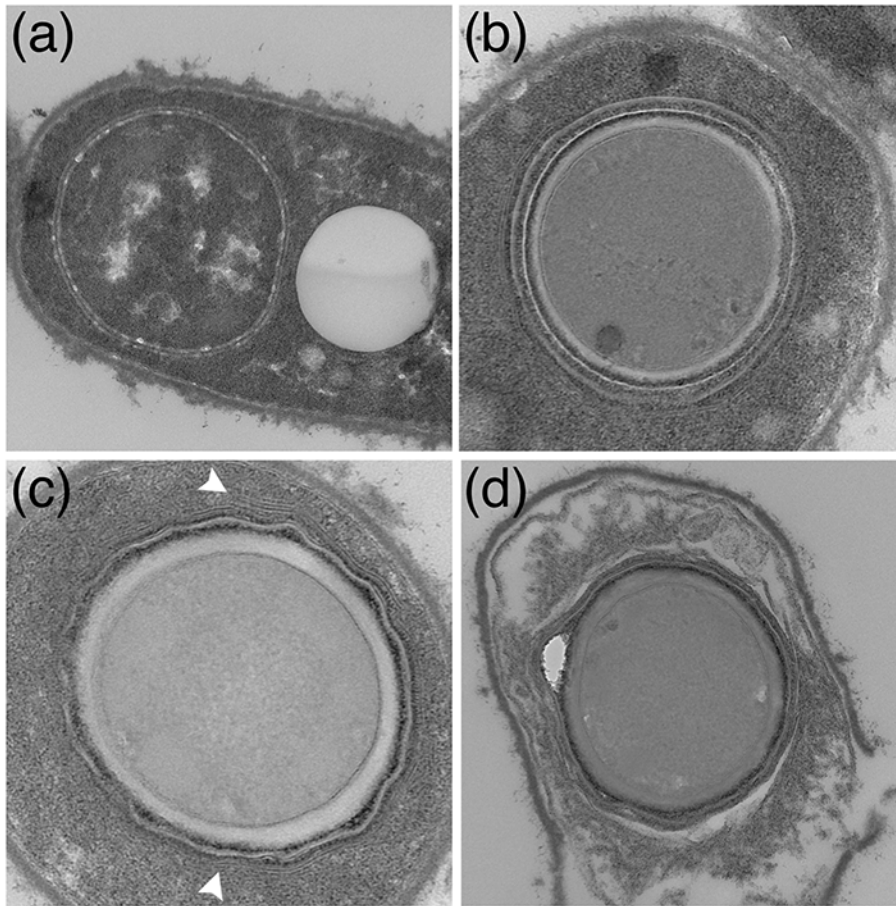

Figure S7 Thin section transmission electron micrographs of sporulating *B. megaterium* PV361 pHT315:*cotW cotXI cotX2* cells. Cells were imaged at (a) 4 (b) 6 (c) 9, and (d) 24 hours after entry to sporulation. The white arrows in (c) are pointing to concentric rings that form outer coat or exosporium material. Granular exosporium-like material is evident in (d), which shows a mother cell undergoing lysis.



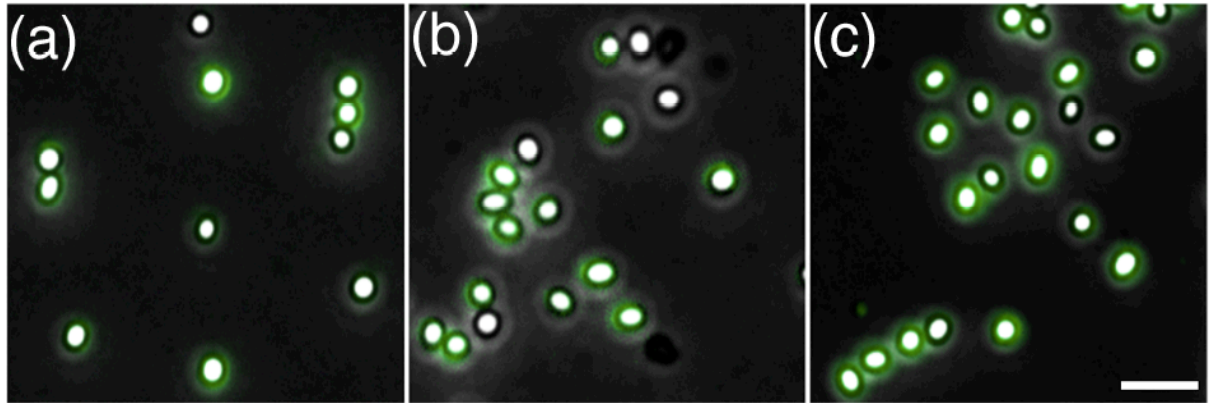

Figure S8 Assessing the stability of the rudimentary exosporium layer in response to shear stress and sonication. The images show fluorescence/phase contrast over-laid images of PV361 *cotW-cotX1-cotX2-gfp* spores following (a) no treatment, (b) two passages through a cell-disrupter instrument operating at 20 kPsi, and (c) seven x 1 min rounds of sonication. Spores were resuspended in 4 ml ice-cold deionised water at an  $OD_{600}$  of  $\sim 70$  prior to cell disruption. Similarly, spores were resuspended in ice-cold deionised water at an  $OD_{600}$  of  $\sim 10$  for sonication and cooled in ice-slurry between sonication cycles. The size bar denotes 5  $\mu\text{m}$ .

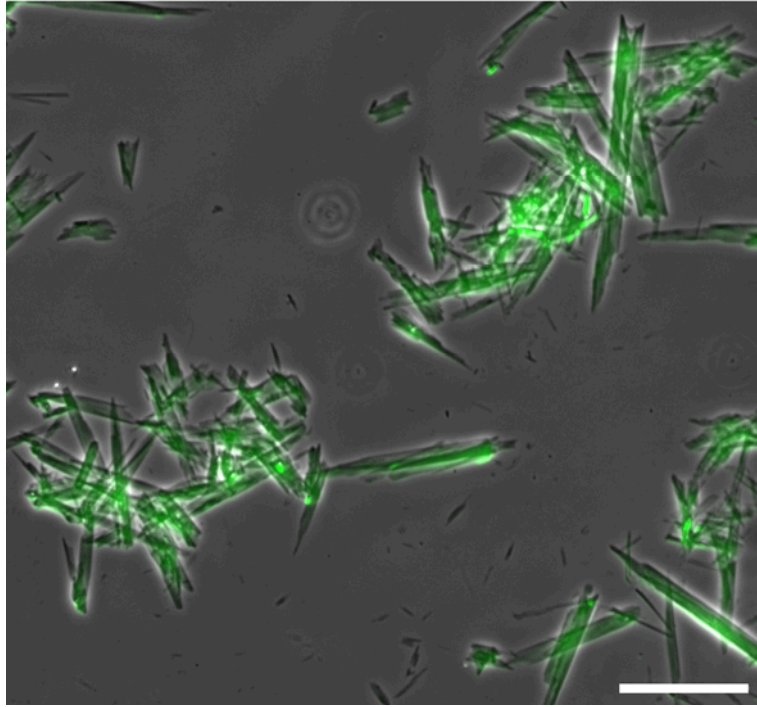

Figure S9 Fluorescence-phase microscopy overlay of thioflavin-T stained recombinant *B. megaterium* CotW protein. The size bar denotes 100  $\mu\text{m}$ .

#### References

1. Imamura D, Kuwana R, Takamatsu H, Watabe K. 2011. Proteins involved in formation of the outermost layer of *Bacillus subtilis* spores. *J Bacteriol* 193:4075-4080.
2. McKenney PT, Driks A, Eskandarian HA, Grabowski P, Guberman J, Wang KH, Gitai Z, Eichenberger P. 2010. A distance-weighted interaction map reveals a previously uncharacterized layer of the *Bacillus subtilis* spore coat. *Curr Biol* 20:934-938.
3. Stewart GC. 2015. The exosporium layer of bacterial spores: a connection to the environment and the infected host. *Microbiol Mol Biol Rev* 79:437-457.
4. Henriques AO, Moran CP. 2007. Structure, assembly, and function of the spore surface layers. *Annu Rev Microbiol* 61:555-588.
